# Supplementary material for: On-demand controlled bidirectional DNAzyme path for ultra-sensitive heavy metal ion detection
Source: Royal Society of Chemistry journal article supplement (doi:10.1039/d4sc04404e), 2024-01-01
Supplement: d4sc04404e2.pdf [file d4sc04404e2.pdf]

## Supporting Information

### On-demand controlled bidirectional DNzyme path for ultra-sensitive heavy metal ion detection

Jing Xu,<sup>a</sup> Yujin Li,<sup>a,b</sup> Futing Wang,<sup>b</sup> Xinqi Luo,<sup>a</sup> Wei Zhang,<sup>f</sup> Yifan Lyu,<sup>b</sup>  
Hongfen Yang,<sup>e</sup> Ren Cai,<sup>b\*</sup> Weihong Tan<sup>b,c,d</sup>

<sup>a</sup> College of Chemistry and Chemical Engineering, Xinyang Normal University, Dabie Mountain Laboratory, Xinyang 464000, China.

<sup>b</sup> Molecular Science and Biomedicine Laboratory, State Key Laboratory for Chemo/Bio-Sensing and Chemometrics, College of Material Science and Engineering, College of Chemistry and Chemical Engineering, College of Biology, Hunan University, Changsha, 410082, China.

<sup>c</sup> The Cancer Hospital of the University of Chinese Academy of Sciences (Zhejiang Cancer Hospital), Hangzhou Institute of Medicine, Chinese Academy of Sciences, Hangzhou, Zhejiang 310022, China.

<sup>d</sup> Institute of Molecular Medicine, Renji Hospital, Shanghai Jiao Tong University School of Medicine, and College of Chemistry and Chemical Engineering, Shanghai Jiao Tong University, Shanghai 200240, China.

<sup>e</sup> Hunan Key Laboratory of Typical Environmental Pollution and Health Hazards, School of Public Health, Hengyang Medical School, University of South China, Hengyang, Hunan 421001, China.

<sup>f</sup> College of Life Science, Xinyang Normal University, Dabie Mountain Laboratory, Xinyang 464000, China.

\* To whom correspondence should be addressed. Email: [cairen@hnu.edu.cn](mailto:cairen@hnu.edu.cn).

# Contents

|                           |     |
|---------------------------|-----|
| Chemicals.....            | S4  |
| Experimental Section..... | S4  |
| Characterization.....     | S7  |
| Movie S1.....             | S8  |
| Figure S1.....            | S9  |
| Figure S2.....            | S10 |
| Figure S3.....            | S11 |
| Figure S4.....            | S12 |
| Figure S5.....            | S13 |
| Figure S6.....            | S14 |
| Figure S7.....            | S15 |
| Figure S8.....            | S16 |
| Figure S9.....            | S17 |
| Figure S10.....           | S18 |
| Figure S11.....           | S19 |
| Figure S12.....           | S20 |
| Figure S13.....           | S21 |
| Figure S14.....           | S22 |
| Figure S15.....           | S23 |
| Figure S16.....           | S24 |
| Figure S17.....           | S25 |
| Table                     |     |
| S1.....                   | S26 |
| Table                     |     |

|                 |     |
|-----------------|-----|
| S2.....         | S27 |
| Table           |     |
| S3.....         | S28 |
| Table           |     |
| S4.....         | S29 |
| Table           |     |
| S5.....         | S30 |
| References..... | S31 |

## Chemicals

The DNA sequences of oligonucleotides (**Table S1**) were purchased from Shanghai Shengong Biotechnology Co., Ltd. Bovine Serum Albumin (BSA, A8010-10g,  $\geq 96\%$ ), 1-ethyl-3-(3'-dimethylaminopropyl) carbodiimide (EDC,  $\geq 98\%$ ), N-hydroxysuccinimide (NHS,  $\geq 98\%$ ), glucose oxidase (GOD, BR, 100-250 U/mg), hexammineruthenium (III) chloride ( $[\text{Ru}(\text{NH}_3)_6]^{3+}$ ,  $\geq 98\%$ ), diethylprocarbonate (DEPC,  $\geq 99\%$ ), chloroauric acid tetrahydrate ( $\text{HAuCl}_4 \cdot 3\text{H}_2\text{O}$ ,  $\geq 99\%$ ), 4-(N-maleimidomethyl) cyclohexane-1-carboxylic acid 3-sulfo-N-hydroxysuccinimide ester sodium salt (sulfo-SMCC,  $\geq 99\%$ ), phosphate buffered saline (PBS), sodium citrate ( $\geq 99\%$ ), monosodium dihydrogen phosphate ( $\text{NaH}_2\text{PO}_4$ ,  $\geq 99\%$ ), ethanol ( $\text{C}_2\text{H}_6\text{OH}$ ,  $\geq 99\%$ ), and disodium hydrogen phosphate ( $\text{Na}_2\text{HPO}_4$ ,  $\geq 99\%$ ) were obtained from Sinopharm Chemical Reagent Co. Ltd (Shanghai, China). The carbon paper (CP) (WOS1009) was purchased from Sigma-Aldrich. Potassium ferrocyanide trihydrate ( $\text{K}_4[\text{Fe}(\text{CN})_6]$ ,  $\geq 99.95\%$ ), potassium ferricyanide ( $\text{K}_3[\text{Fe}(\text{CN})_6]$ ,  $\geq 99.5\%$ ), potassium chloride ( $\text{KCl}$ ,  $\geq 99.5\%$ ),  $\text{CuSO}_4 \cdot 5\text{H}_2\text{O}$  ( $\geq 99\%$ ),  $\text{NaOH}$  ( $\geq 97\%$ ), sodium chloride (AR, 99.5%), ascorbic acid ( $\geq 99\%$ ),  $\text{Na}_2\text{S} \cdot 9\text{H}_2\text{O}$  (AR, 99%),  $\text{Na}_2\text{S}_2\text{O}_3 \cdot 5\text{H}_2\text{O}$  (AR, 99%), dopamine hydrochloride ( $\geq 98\%$ ), L-cysteine ( $\geq 99\%$ ), ammonium molybdate tetrahydrate (AR, 99%), tris buffer solution (0.01 M) were purchased from McLean Biochemical Reagent Co., Ltd.

The  $[\text{Fe}(\text{CN})_6]^{3-/4-}$  solution for the electrochemical tests consisted of 10 mM  $\text{K}_4\text{Fe}(\text{CN})_6$ , 10 mM  $\text{K}_3\text{Fe}(\text{CN})_6$ , and 0.1 M  $\text{KCl}$ . The buffer solutions for the experiment were as follows: phosphate buffered solutions (PBS) consisted of 0.1 M  $\text{NaCl}$ , 0.1 M  $\text{Na}_2\text{HPO}_4$ , and 0.1 M  $\text{NaH}_2\text{PO}_4$  (pH 7.4). The TE buffer consisted of 10 mM Tris-HCl, 1 mM EDTA, and 12.5 mM  $\text{MgCl}_2$  (pH 8). The above buffers were used with 0.1 M of  $\text{HCl}$  or 0.1 M of  $\text{NaOH}$  solution to regulate the pH.

## Experimental Section

### Synthesis of $\text{MoS}_2@\text{CuS}$ heterostructures

First, 0.4981 g (1.99 mmol)  $\text{CuSO}_4 \cdot 5\text{H}_2\text{O}$  and 0.5161 g (2.00 mmol) sodium citrate were dissolved in 320 mL deionized water and stirred for 30 min. Then, 80 mL  $\text{NaOH}$  (1.25 M) was added to the above solution and stirred for 30 min. Next, 200 mL ascorbic acid solution (3.00 M) was slowly added to the above solution and aged for 1 h at room temperature. The final product was washed and collected centrifugally with ethanol and deionized water, and dried for 12 h at 80 °C.

Cu<sub>2</sub>O nanocubes (0.5 g) were dispersed in 300 mL deionized water. Next, 100 mL Na<sub>2</sub>S aqueous solution (6.25 mM) was added to the above solution and stirred for 30 min at room temperature. The as-obtained product was washed several times with water and ethanol, and dried for 12 h at 80 °C.

The as-prepared Cu<sub>2</sub>O@CuS nanocubes (0.5 g) were dispersed in 100 mL ethanol/H<sub>2</sub>O (1:1) solvent. Then, 80 mL Na<sub>2</sub>S<sub>2</sub>O<sub>3</sub> solution (1 M) was added to the above solution and stirred for 30 min at room temperature. The precipitate was collected by centrifugation, washed several times, and vacuum dried for 12 h at 80 °C to obtain hollow CuS nanocubes.

Hollow CuS nanocubes (0.06 g), 0.06 g ammonium molybdate tetrahydrate and 6 g L-cysteine were dissolved in 75 mL deionized water with stirring for 3 h at room temperature. The solution was transferred to an autoclave, and reacted for 24 h at 220 °C. After cooling, the product was alternately cleaned with ethanol and deionized water several times, and vacuum dried for 12 h to obtain the final product of MoS<sub>2</sub>@CuS heterostructures.

### **Synthesis of AuNPs**

First, 20 μL HAuCl<sub>4</sub>·3H<sub>2</sub>O solution (1%) was dropped into 50 mL deionized water, and heated to 110 °C. Then, 500 μL Na<sub>3</sub>C<sub>6</sub>H<sub>5</sub>O<sub>7</sub>·2H<sub>2</sub>O (1%) was quickly added to the above solution. The color of the solution gradually turned red, and heating was continued for another 10 min. Then, the final solution was stirred and cooled to room temperature. The as-prepared AuNPs were stored in the dark at 4 °C.

### **Synthesis of AuNPs/MoS<sub>2</sub>@CuS heterostructures**

One mg MoS<sub>2</sub>@CuS heterostructures was dispersed in 8 mL deionized water. The solution was mixed with 1 mL ethanol and 1 mL AuNPs solution under oscillation at room temperature to obtain AuNPs/MoS<sub>2</sub>@CuS heterostructures.

### **Synthesis of DNAzyme**

DNAzyme, a double-strand DNA (S1-S2), was synthesized by the hybridization of DNA S1 (500 μL, 2 μM) and DNA S2 with enzyme sites (500 μL, 2 μM) for 5 min at 95 °C.

### **Synthesis of HCR**

Hairpin H1 (25 μL, 2 μM) and hairpin H2 (25 μL, 2 μM) were mixed and incubated for 60 min at 37 °C to obtain the HCR product (H1, H2).

### **Preparation of the bioanode**

First, carbon paper (CP, 1 cm × 1 cm) was immersed in HNO<sub>3</sub> (69 %) for 90 min and washed with DI-water several times. Then, 50 μL AuNPs/MoS<sub>2</sub>@CuS solution (0.1 mg/mL) was dropped onto the CP surface and dried at 37 °C for 2 h to obtain AuNPs/MoS<sub>2</sub>@CuS/CP. Next, 30 μL EDC/NHS (1 mg/mL) was added to the surface of AuNPs/MoS<sub>2</sub>@CuS/CP and incubated for 30 min to activate AuNPs by conjugating -COOH groups from EDC/NHS. Then, 50 μL DNAzyme (i.e., S1-S2, 1 μM) was immobilized on the surface of the as-activated AuNPs/MoS<sub>2</sub>@CuS/CP by Au-S bonding at 4 °C for 12 h to obtain DNAzyme/AuNPs/MoS<sub>2</sub>@CuS/CP. Bovine albumin (BSA, 1 mg/mL, 50 μL) was used to avoid non-specific adsorption on DNAzyme/AuNPs/MoS<sub>2</sub>@CuS/CP. Next, 50 μL Pb<sup>2+</sup> solution (1 pM) was dropped onto the surface of DNAzyme/AuNPs/MoS<sub>2</sub>@CuS/CP and incubated at 37 °C for 80 min to obtain Pb<sup>2+</sup>/DNAzyme/AuNPs/MoS<sub>2</sub>@CuS/CP. Here, Pb<sup>2+</sup> cleaves the active sites of S2. Finally, the resulting Pb<sup>2+</sup>/DNAzyme/AuNPs/MoS<sub>2</sub>@CuS/CP is incubated with 50 μL S3-GOD (1 μM, see Supporting Information) at 37 °C for 80 min to obtain the bioanode, S3-GOD/Pb<sup>2+</sup>/DNAzyme/AuNPs/MoS<sub>2</sub>@CuS/CP by hybridization of S3 and S2 of DNAzyme at 37 °C.

### **Preparation of the biocathode**

Fifty μL S4 (1 μM) was added to the surface of as-activated AuNPs/MoS<sub>2</sub>@CuS/CP at 4 °C for 12 h to obtain S4/AuNPs/MoS<sub>2</sub>@CuS/CP, with 50 μL bovine albumin (BSA, 1 mg/mL) to avoid non-specific adsorption. Next, 50 μL S5 (1 μM) and 50 μL Hg<sup>2+</sup> solution (1 pM) was dropped on the surface of S4/AuNPs/MoS<sub>2</sub>@CuS/CP and incubated at 37 °C for 70 min to obtain S5-Hg<sup>2+</sup>/S4/AuNPs/MoS<sub>2</sub>@CuS/CP by forming a T-Hg<sup>2+</sup>-T structure between S4 and S5. Finally, the HCR product (H1, H2 mixture, 50 μL, 1 μM) was fixed on S5-Hg<sup>2+</sup>/S4/AuNPs/MoS<sub>2</sub>@CuS/CP to obtain H1, H2/S5-Hg<sup>2+</sup>/S4/AuNPs/MoS<sub>2</sub>@CuS/CP at 37 °C after 90 min incubation, thus, triggering the HCR reaction to form abundant double-stranded DNA.

### **Preparation of the self-powered biosensor**

The self-powered biosensor was fabricated with the bioanode, i.e., S3-GOD/Pb<sup>2+</sup>/DNAzyme/AuNPs/MoS<sub>2</sub>@CuS/CP, and the biocathode, i.e., H1, H2/S5-Hg<sup>2+</sup>/S4/AuNPs/MoS<sub>2</sub>@CuS/CP. The Pb<sup>2+</sup> or Hg<sup>2+</sup> is identified by the DNAzymes when either Pb<sup>2+</sup> or Hg<sup>2+</sup> is present. In the self-powered biosensor, a catalytic

oxidation reaction of glucose ( $\text{Glucose} + \text{O}_2 + \text{GOD} \rightarrow \text{Gluconic acid} + \text{H}_2\text{O}_2$ ) occurs at the bioanode simultaneously with the reduction reaction:  $[\text{Ru}(\text{NH}_3)_6]^{3+} + e^- \rightarrow [\text{Ru}(\text{NH}_3)_6]^{2+}$  at the biocathode.  $\text{Pb}^{2+}$  and  $\text{Hg}^{2+}$  are monitored at the bioanode and biocathode by observing electrochemical currents, respectively. Finally, the self-powered biosensor quasi-simultaneously detects  $\text{Pb}^{2+}$  and  $\text{Hg}^{2+}$  by testing the open-circuit voltage ( $E^{ocv}$ ).

### Characterization

Transmission electron microscopy (TEM) and scanning electron microscopy (SEM) images of  $\text{MoS}_2@\text{CuS}$  heterostructures and  $\text{AuNPs}/\text{MoS}_2@\text{CuS}$  heterostructures were obtained on a JEOL TEM (JEM-2100Plus, Japan) and a JEOL SEM (JSM-6360LA, Japan), respectively. The UV-vis absorption spectra were acquired using UV-2450 spectrophotometer (Shimadzu Co., Ltd., Japan). Fourier transform infrared spectroscopy (FTIR) characterizations were carried out on a Nicolet In10 (Thermo Fisher, USA). The X-ray photoelectron spectroscopy (XPS) spectra of  $\text{AuNPs}/\text{MoS}_2@\text{CuS}$  heterostructures were studied with an AXIS SUPRA+ (Shimadzu Co., Ltd., Japan). Electrochemical impedance spectroscopy (EIS), cyclic voltammetry (CV), differential pulse voltammetry (DPV), linear sweep voltammetry (LSV), and open circuit voltage ( $E^{ocv}$ ) were studied with a CHI 660E electrochemical workstation (Chenhua Instrument Shanghai Co., Ltd., China).  $E^{ocv}$  was measured in a biocathode and bioanode two-electrode system with 0.1 M phosphate solution (pH=7.4, containing 5 mM glucose and 500  $\mu\text{M}$   $[\text{Ru}(\text{NH}_3)_6]^{3+}$ ).

### Limit of detection calculation

The limit of detection (LOD) is calculated based on  $\text{LOD} = (\text{Mean} + 3S_D)/k$ . Here, the mean is the detection average value of ten parallel measurements,  $S_D$  is the standard deviation of ten parallel controlled measurements, and  $k$  is the signal-to-noise ratio of 3.

For  $\text{Pb}^{2+}$  detection in CV test, the mean = 1.51 mA,  $S_D = 0.113$ ,  $k_1 = 3$ , and the smallest detectable current ( $I$ ) was calculated as:  $I_{\text{LOD}} = b + kS_D = 1.855$  mA. According to the linear regression equation:  $I = 0.01 \lg C_{\text{Pb}^{2+}} + 0.2$ , the  $\text{LOD}_1$  was calculated to be 3.1 fM.

For  $\text{Hg}^{2+}$  detection in DPV test, the mean = 0.92 mA,  $S_D = 0.078$ ,  $k_1 = 3$ , and the

smallest detectable current (I) absorption was calculated as:  $I_{LOD} = \text{mean} + kS_D = 1.15$ . According to the linear regression equation:  $I = 0.1 \lg C_{Hg^{2+}} + 2.4$ , the  $LOD_2$  was calculated to be 0.32 pM.

In the bidirectional detection of  $Pb^{2+}$  and  $Hg^{2+}$  process, for  $Pb^{2+}$  detection, the mean = 0.051 V,  $S_D = 0.009$ ,  $k_1 = 3$ , and the smallest detectable volt ( $E^{ocv}$ ) was calculated as:  $E^{ocv}_{LOD} = \text{mean} + kS_D = 0.078$  V. According to the linear regression equation:  $E^{ocv} = 0.078 \log C_{Pb^{2+}} + 1.21$ , the  $LOD_3$  was calculated to be 3.1 fM. For  $Hg^{2+}$  detection, the mean = 0.034 V,  $S_D = 0.007$ ,  $k_1 = 3$ , and the smallest detectable volt ( $E^{ocv}$ ) was calculated as:  $E^{ocv}_{LOD} = \text{mean} + kS_D = 0.055$ . According to the linear regression equation:  $E^{ocv} = 0.083 \times \log C_{Hg^{2+}} + 1.34$ , the  $LOD_4$  was calculated to be 3.3 aM.

**Movie S1:** The smartphone reads out the instantaneous current operation of the self-powered sensor with a capacitor.



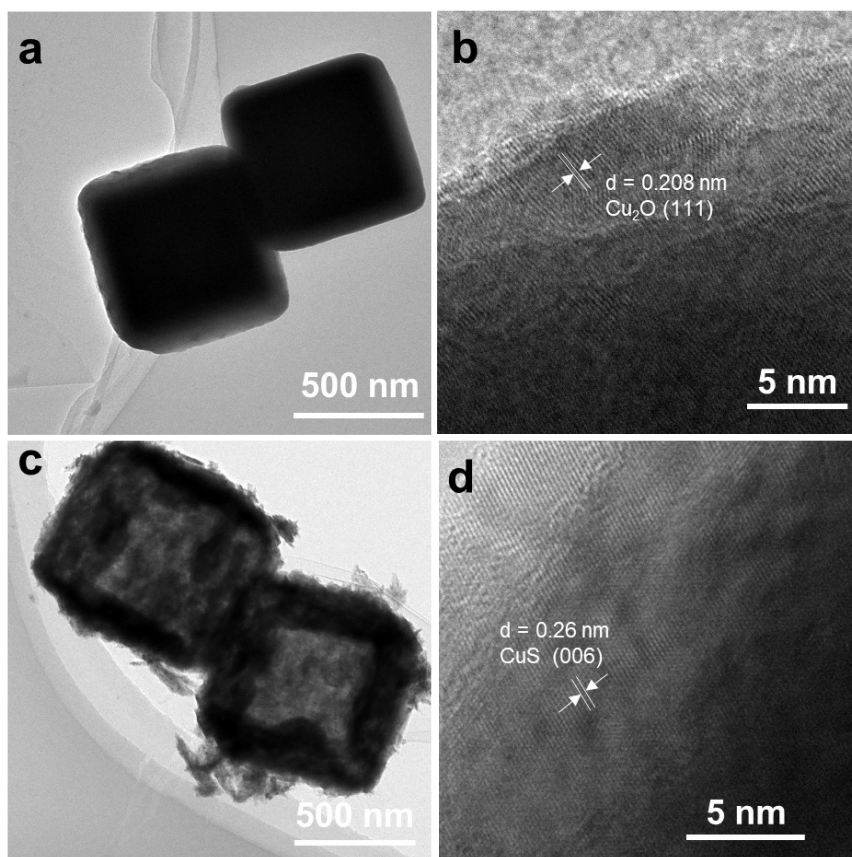

**Figure S1.** TEM images of Cu<sub>2</sub>O templates and CuS nanocubes.

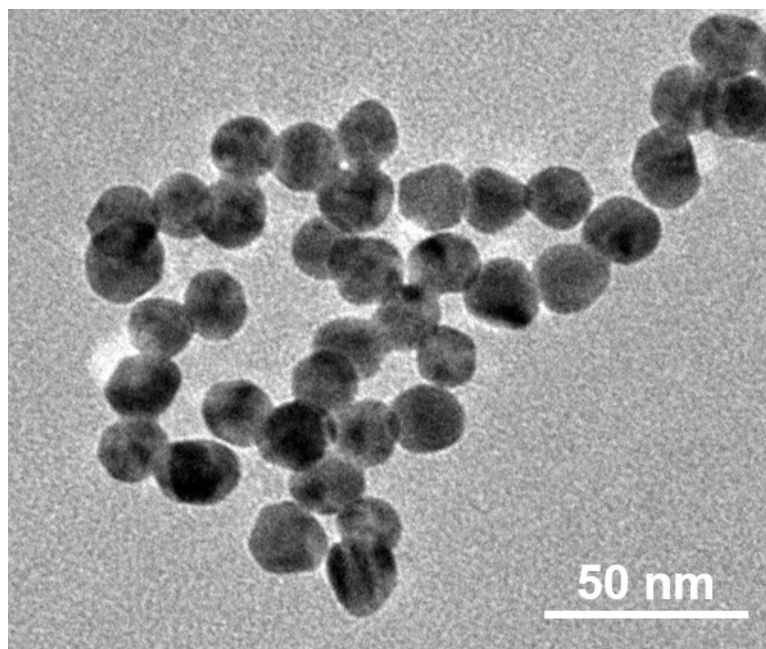

**Figure S2.** TEM images of AuNPs.

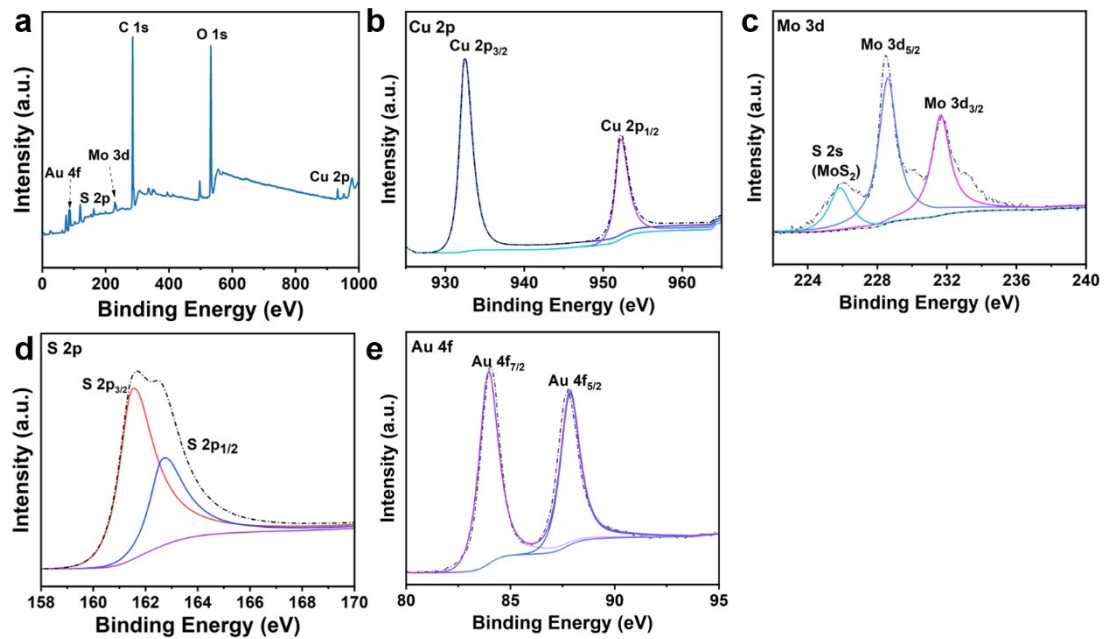

**Figure S3.** XPS of AuNPs/MoS<sub>2</sub>@CuS heterostructures: (a) full spectrum and (b-e) high resolution spectra of Cu 2p, Mo 3d, S 2p, and Au 4f.

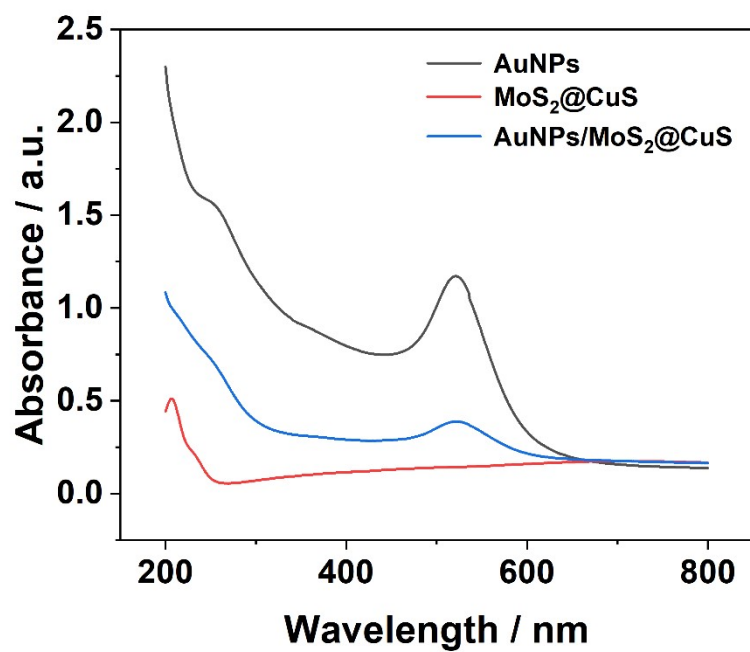

**Figure S4.** AuNPs, MoS<sub>2</sub>@CuS, and AuNPs/MoS<sub>2</sub>@CuS heterostructures UV-vis absorption spectra.

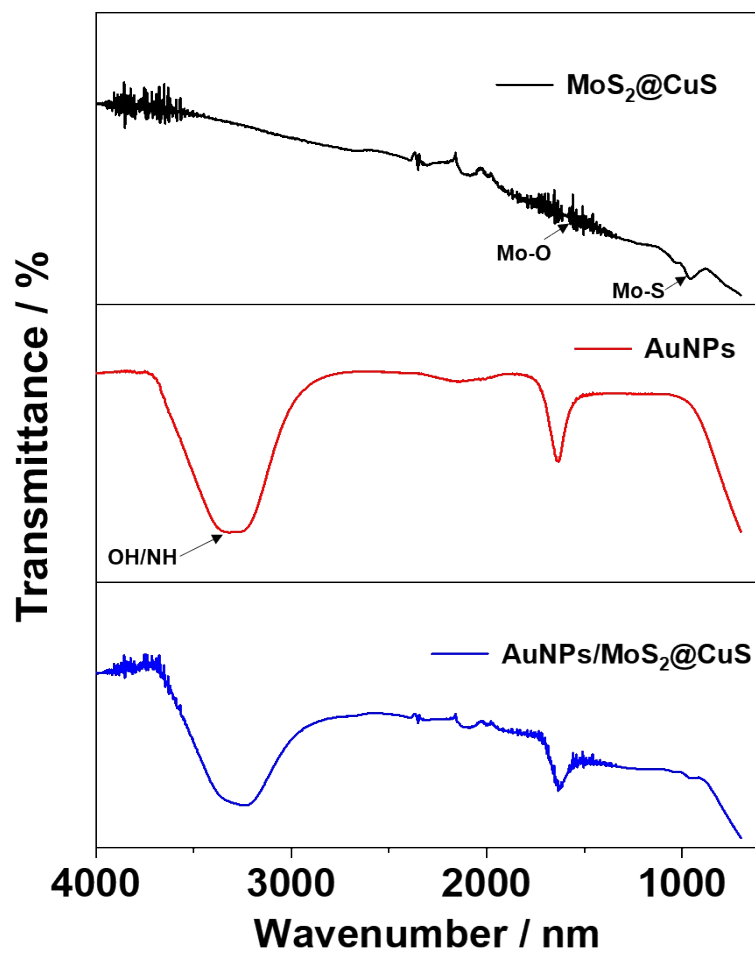

**Figure S5.** The FTIR spectra of AuNPs, MoS<sub>2</sub>@CuS, and AuNPs/MoS<sub>2</sub>@CuS heterostructures.

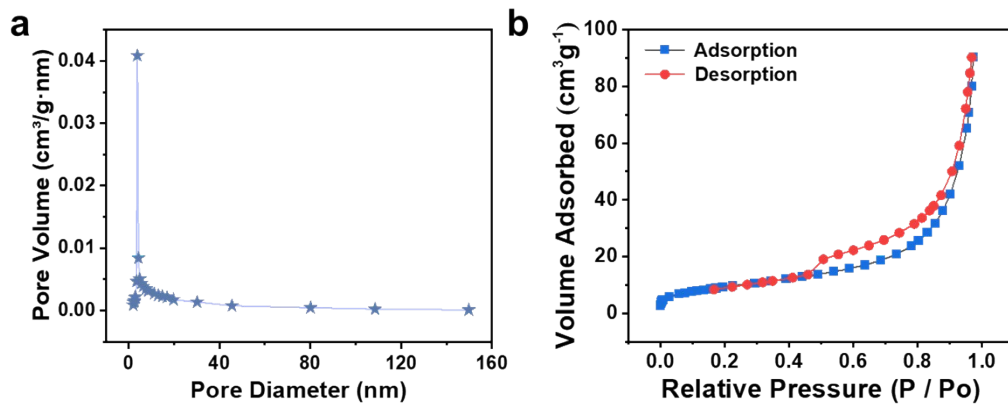

**Figure S6.** (a) Nitrogen adsorption-desorption isotherms and (b) BET pore size distribution curves of MoS<sub>2</sub>@CuS heterostructures.

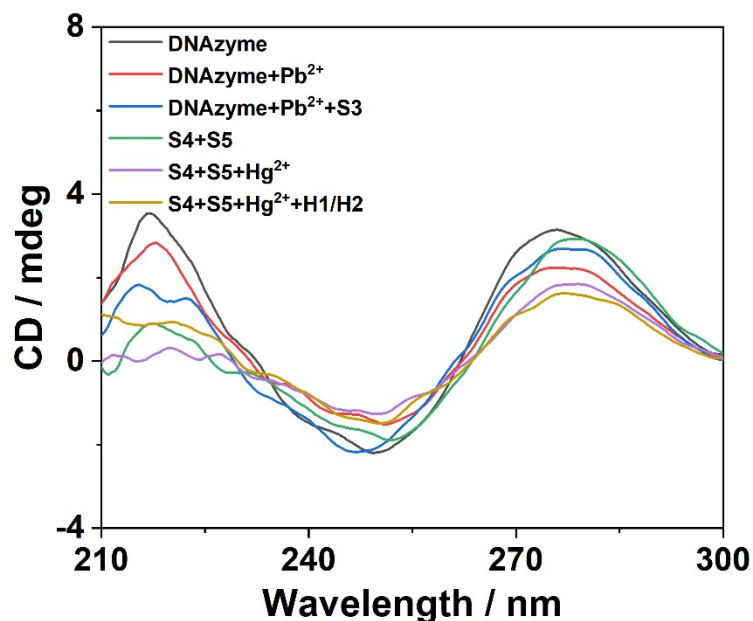

**Figure S7.** CD spectra for the confirmation of the cutting effect of  $\text{Pb}^{2+}$  for DNAzyme and T- $\text{Hg}^{2+}$ -T complex formation.

Note: For bioanode, the DNAzyme was connected with AuNPs/ $\text{MoS}_2$ @CuS by Au-S bond, and there was a positive peak at 279 nm and a negative peak at 249 nm, indicating that the DNA has an B-DNA form structure. After  $\text{Pb}^{2+}$  (10 fM) cut, the amplitude of positive and negative peaks of DNAzyme decreased, but the position of peaks did not change. The cut part, as-split S2 hybridizes with S3 by complementary base pairing, resulting in two weak positive peaks at 215 and 222 nm. For biocathode, the S4 was connected with AuNPs/ $\text{MoS}_2$ @CuS by Au-S bond, and there was a positive peak at 279 nm and a negative peak at 249 nm corresponding to the B-DNA form structure. Next,  $\text{Hg}^{2+}$  (10 fM) was added to form a T- $\text{Hg}^{2+}$ -T structure, resulting in the disappearance of the positive peak at 215 nm, and the subsequent S4+S5+ $\text{Hg}^{2+}$ +H1/H2 also disappeared the positive peak at 215 nm, and the negative peak intensity at 249nm increased slightly.

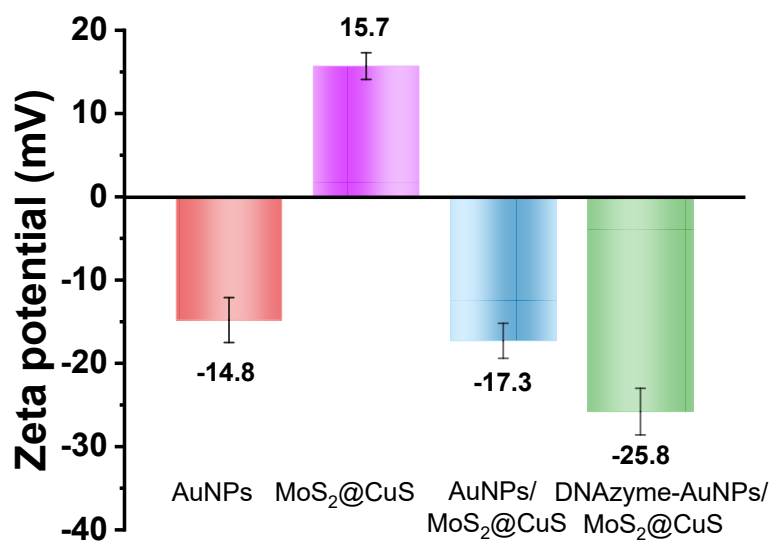

**Figure S8.** The  $\zeta$ - potential of AuNPs, MoS<sub>2</sub>@CuS heterostructures, AuNPs/MoS<sub>2</sub>@CuS and DNAzyme-AuNPs/MoS<sub>2</sub>@CuS.



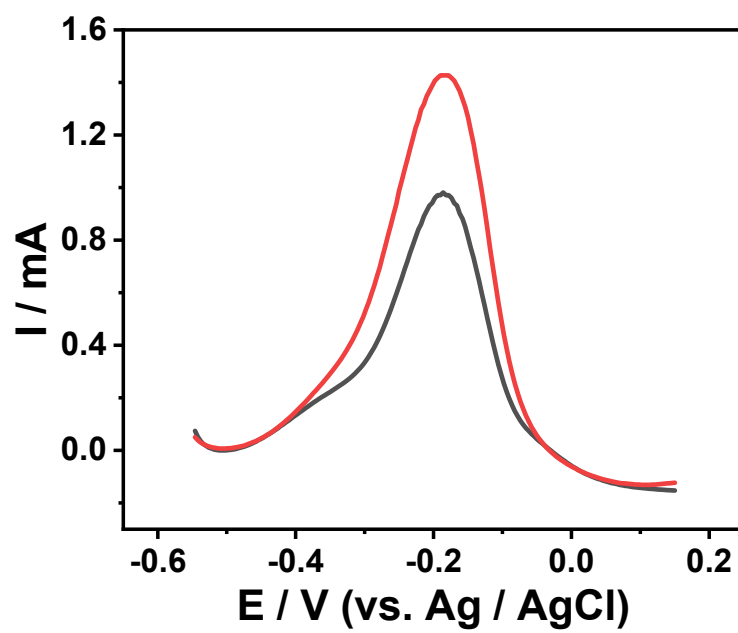

**Figure S9.** The DPV of detecting 1 nM  $\text{Hg}^{2+}$  before and after combining the HCR strategy.

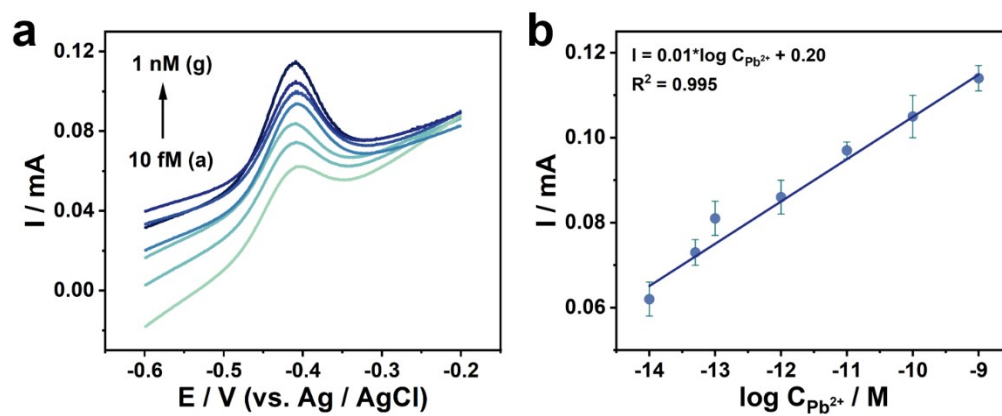

**Figure S10.** (a) CV curves and (b) linear relationship of the bioanodes with different concentrations of  $Pb^{2+}$ .

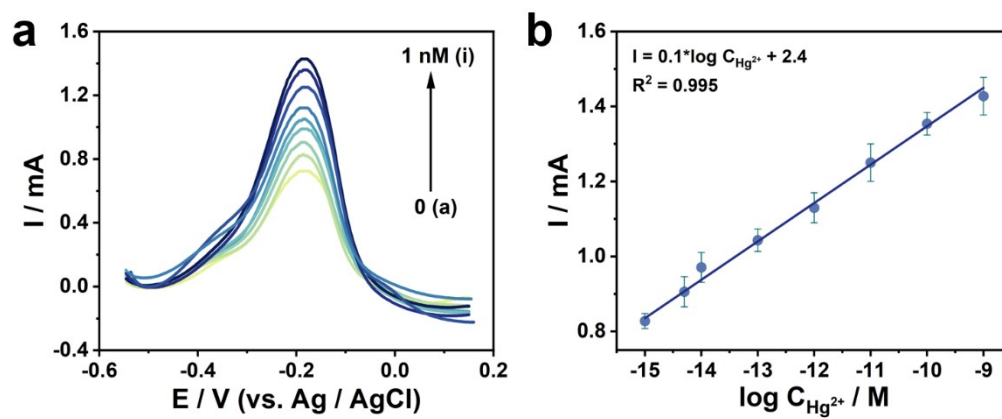

**Figure S11.** (a) DPV curves and (b) linear relationships of the biocathodes with different concentrations of  $\text{Hg}^{2+}$ .

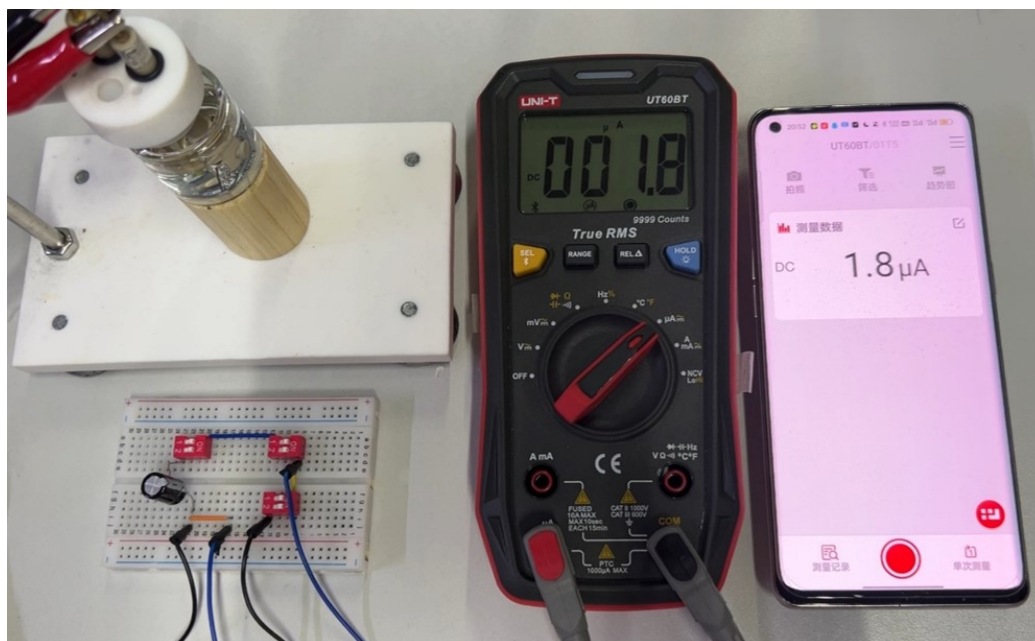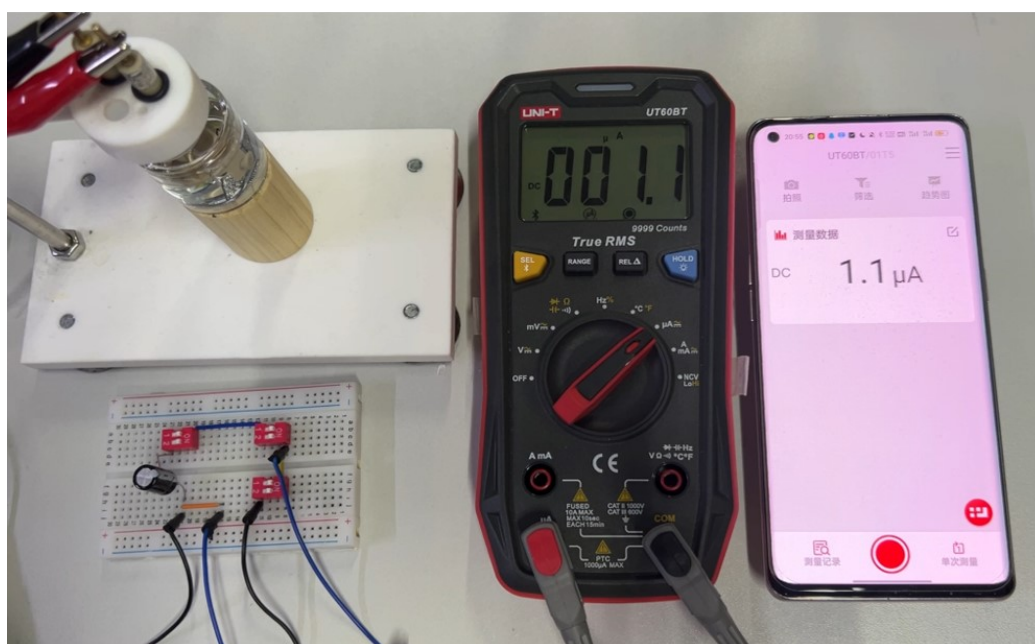

**Figure S12.** Digital photographs of the smartphone reading out the instantaneous current from the bidirectional self-powered biosensor with a capacitor.

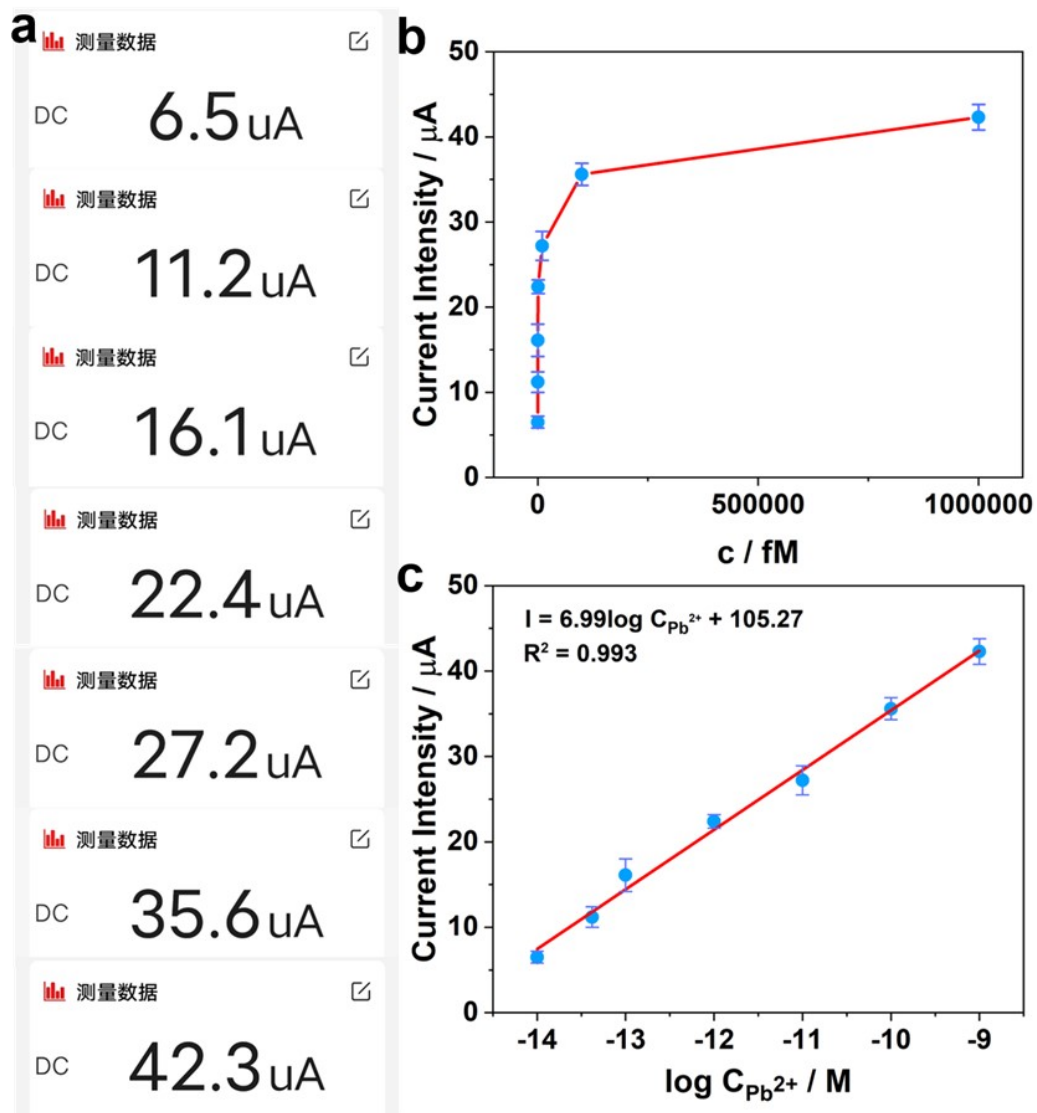

**Figure S13.** (a) Instantaneous current data received by the smartphone for different concentrations of  $\text{Pb}^{2+}$  (b-c) The relationship between the instantaneous current and the concentration of  $\text{Pb}^{2+}$  displayed by the smartphone.

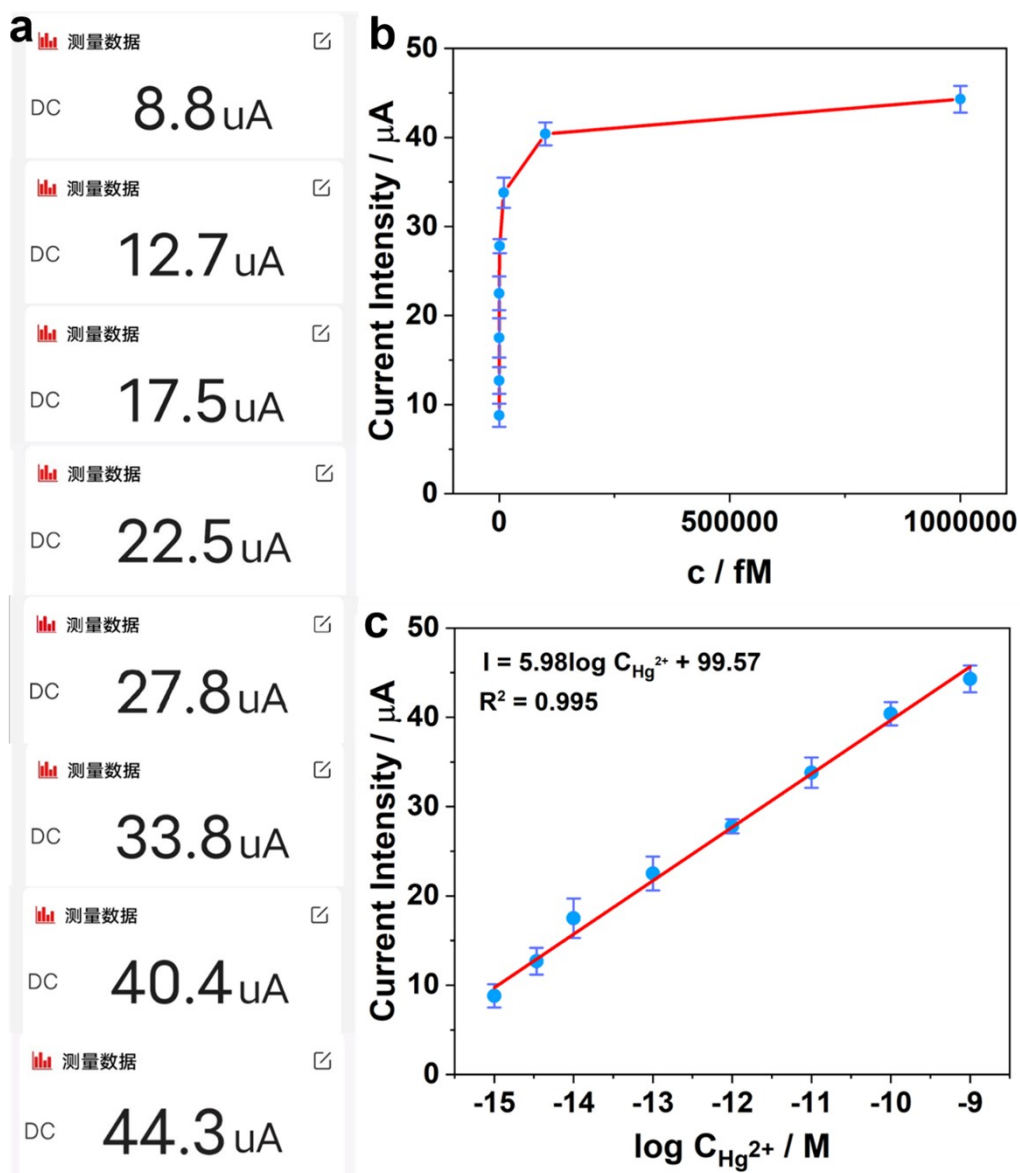

**Figure S14.** (a) Instantaneous current data received by the smartphone. (b-c) Relationship between the instantaneous current and the concentration of  $\text{Hg}^{2+}$  displayed by the smartphone.

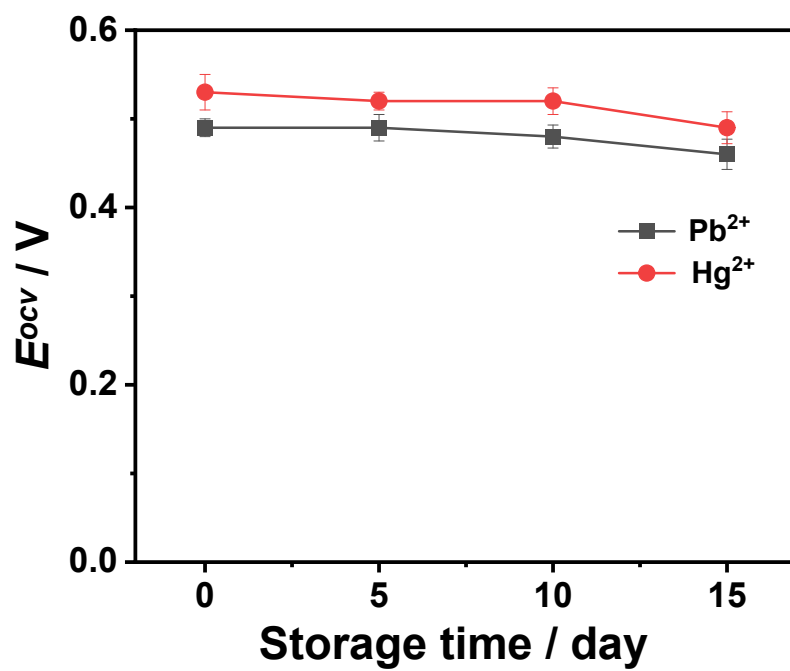

**Figure S15.** Stability of the bidirectional self-powered biosensor with the 1 nM  $Pb^{2+}$  and  $Hg^{2+}$ .

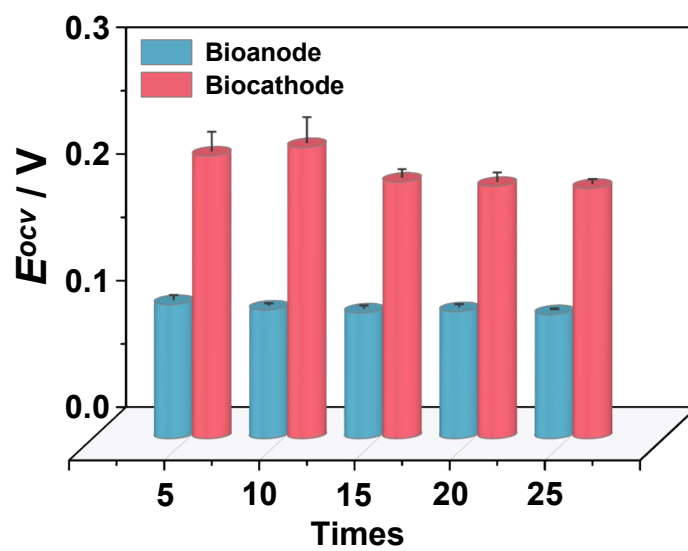

**Figure S16.** Recyclability of the bidirectional self-powered biosensor.



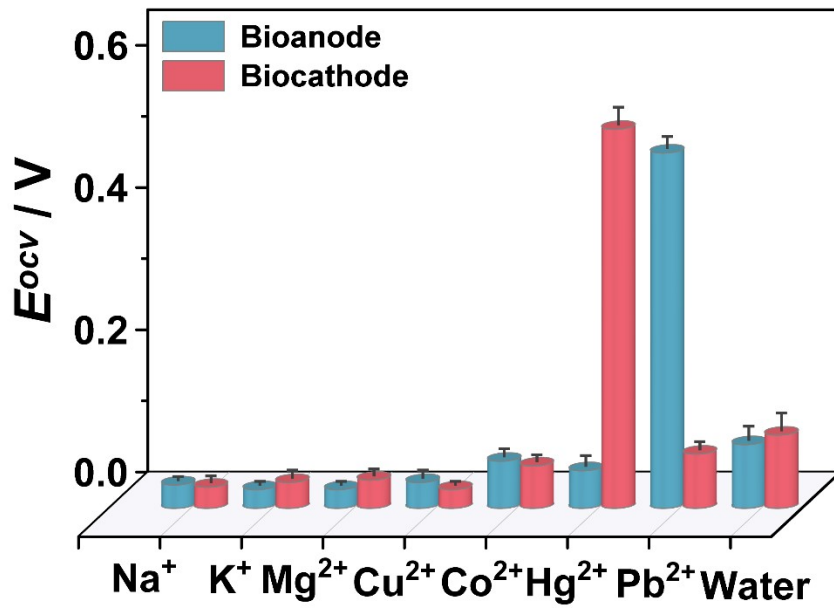

Figure S17. Selectivity of the bioanode and the biocathode.

**Table S1.** Different sequences of oligonucleotides

| Oligonucleotides | Sequences                                                                                     |
|------------------|-----------------------------------------------------------------------------------------------|
| S1               | <b>5'-ACTCACTATrAGGAAGAGATG -3'</b>                                                           |
| S2               | <b>5'- HS-(CH<sub>2</sub>)<sub>6</sub>-<br/>TTTCATCTCTTCTCCGAGCCGGTCGAAATAGTGAGT -<br/>3'</b> |
| S3               | <b>5'- HS-<br/>ACTCACTATTTTCGACCGGCTCGGAGAAGAGATG -3'</b>                                     |
| S4               | <b>5'- HS-(CH<sub>2</sub>)<sub>6</sub>-TTTGCTCTCTCGTTT -3'</b>                                |
| S5               | <b>5'-ACTCAATAGCTTTCGTGTGTGCTTT -3'</b>                                                       |
| H1               | <b>5'-GCTATTGAGTCACAATACAG -3'</b>                                                            |
| H2               | <b>5'-ACTCAATAGCCTGTATTGTG -3'</b>                                                            |

**Table S2.** Comparison of the bidirectional self-powered biosensor with other reported methods for Pb<sup>2+</sup> detection

| Method                                      | Linear range                  | LOD                           | References                       |
|---------------------------------------------|-------------------------------|-------------------------------|----------------------------------|
| AC voltammetry (ACV)                        | 0.2 pM - 100 nM               | 0.048 pM                      | Cai et al., 2018 <sup>1</sup>    |
| Differential pulse voltammetry (DPV)        | 0.4 pM - 3×10 <sup>3</sup> nM | 0.27 pM                       | Huang et al., 2018 <sup>2</sup>  |
| Amperometry                                 | 5 pM - 1×10 <sup>3</sup> nM   | 2 pM                          | Yu et al., 2018 <sup>3</sup>     |
| Fluorescence                                | 1×10 <sup>4</sup> pM - 700 nM | 2.7×10 <sup>3</sup> pM        | Paydar et al., 2022 <sup>4</sup> |
| Electrochemiluminescence                    | 10 pM - 50 nM                 | 4 pM                          | Zhu et al., 2021 <sup>5</sup>    |
| <b>Bidirectional self-powered biosensor</b> | <b>0.01 pM - 1 nM</b>         | <b>3.2×10<sup>-3</sup> pM</b> | <b>This work</b>                 |

**Table S3.** Comparison of the bidirectional self-powered biosensor with other reported methods for Hg<sup>2+</sup> detection

| Method                                      | Linear range                                     | LOD                      | References                           |
|---------------------------------------------|--------------------------------------------------|--------------------------|--------------------------------------|
| Electrochemiluminescence                    | 10 fM - 1 nM                                     | 0.45 fM                  | Hang et al., 2018 <sup>6</sup>       |
| Differential pulse voltammetry (DPV)        | 4.9×10 <sup>11</sup> fM - 445×10 <sup>9</sup> fM | 13.5 ×10 <sup>6</sup> fM | Veerakumar et al., 2022 <sup>7</sup> |
| Photoelectrochemical                        | 1×10 <sup>3</sup> fM - 1×10 <sup>4</sup> fM      | 2×10 <sup>2</sup> fM     | Ren et al., 2023 <sup>8</sup>        |
| Electrochemiluminescence                    | 1×10 <sup>5</sup> fM - 2×10 <sup>4</sup> fM      | 5×10 <sup>4</sup> fM     | Zhang et al., 2017 <sup>9</sup>      |
| Fluorescence                                | 5×10 <sup>7</sup> fM – 5.8 ×10 <sup>9</sup> fM   | 3.33×10 <sup>4</sup> fM  | Wang et al., 2021 <sup>10</sup>      |
| <b>Bidirectional self-powered biosensor</b> | <b>1 fM - 1×10<sup>6</sup> fM</b>                | <b>0.31 fM</b>           | <b>This work</b>                     |

**Table S4.** Analytical results of Pb<sup>2+</sup> in samples of local sources of tap water (1-4) and lake water (5-8) (n=3)

| Water Samples | Added (nM) | Found (nM) | Recovery (%) | RSD (%) |
|---------------|------------|------------|--------------|---------|
| 1             | 1          | 1.05       | 105.0        | 3.9     |
| 2             | 10         | 10.31      | 103.1        | 4.7     |
| 3             | 50         | 48.23      | 96.4         | 5.1     |
| 4             | 100        | 99.67      | 99.67        | 5.3     |
| 5             | 1          | 0.98       | 98.0         | 3.7     |
| 6             | 10         | 10.39      | 103.9        | 5.2     |
| 7             | 50         | 50.67      | 101.3        | 4.8     |
| 8             | 100        | 102.3      | 102.3        | 3.9     |

**Table S5.** Analytical results of Hg<sup>2+</sup> in samples of local sources of tap water (1-4) and lake water (5-8) (n=3)

| Water Samples | Added (nM) | Found (nM) | Recovery (%) | RSD (%) |
|---------------|------------|------------|--------------|---------|
| 1             | 1          | 0.97       | 97.0         | 2.1     |
| 2             | 10         | 10.48      | 104.8        | 3.9     |
| 3             | 50         | 50.4       | 100.8        | 4.3     |
| 4             | 100        | 102.3      | 102.3        | 5.9     |
| 5             | 1          | 1.08       | 108.0        | 3.8     |
| 6             | 10         | 9.93       | 99.3         | 4.1     |
| 7             | 50         | 48.87      | 97.7         | 5.8     |
| 8             | 100        | 103.8      | 103.8        | 4.7     |

## Reference

1. Cai, W.; Xie, S.; Zhang, J.; Tang, D.; Tang, Y., Immobilized-free miniaturized electrochemical sensing system for Pb<sup>2+</sup> detection based on dual Pb<sup>2+</sup>-DNAzyme assistant feedback amplification strategy. *Biosens. Bioelectron.* **2018**, *117*, 312-318.
2. Huang, X.; Li, J.; Zhang, Q.; Chen, S.; Xu, W.; Wu, J.; Niu, W.; Xue, J.; Li, C., A protease-free and signal-on electrochemical biosensor for ultrasensitive detection of lead ion based on GR-5 DNAzyme and catalytic hairpin assembly. *J. Electroanal. Chem.* **2018**, *816*, 75-82.
3. Yu, Y.; Yu, C.; Niu, Y.; Chen, J.; Zhao, Y.; Zhang, Y.; Gao, R.; He, J., Target triggered cleavage effect of DNAzyme: Relying on Pd-Pt alloys functionalized Fe-MOFs for amplified detection of Pb<sup>2+</sup>. *Biosens. Bioelectron.* **2018**, *101*, 297-303.
4. Paydar, S.; Feizi, F.; Shamsipur, M.; Barati, A.; Chehri, N.; Taherpour, A.; Jamshidi, M., An ideal ratiometric fluorescent probe provided by the surface modification of carbon dots for the determination of Pb<sup>2+</sup>. *Sens. Actuators, B* **2022**, *369*, 132243.
5. Zhu, L.; Lv, X.; Li, Z.; Shi, H.; Zhang, Y.; Zhang, L.; Yu, J., All-sealed paper-based electrochemiluminescence platform for on-site determination of lead ions. *Biosens. Bioelectron.* **2021**, *192*, 113524.
6. Hang, X.-M.; Zhao, K.-R.; Wang, H.-Y.; Liu, P.-F.; Wang, L., Exonuclease III-assisted CRISPR/Cas12a electrochemiluminescence biosensor for sub-femtomolar mercury ions determination. *Sens. Actuators, B* **2022**, *368*, 132208.
7. Veerakumar, P.; Jaysiva, G.; Chen, S.-M.; Lin, K.-C., Development of Palladium on Bismuth Sulfide Nanorods as a Bifunctional Nanomaterial for Efficient Electrochemical Detection and Photoreduction of Hg(II) Ions. *ACS Appl. Mater. Interfaces* **2022**, *14* (4), 5908-5920.
8. Ren, X.; Chen, J.; Wang, C.; Wu, D.; Ma, H.; Wei, Q.; Ju, H., Photoelectrochemical Sensor with a Z-Scheme Fe(2)O(3)/CdS Heterostructure for Sensitive Detection of Mercury Ions. *Anal. Chem.* **2023**, *95* (46), 16943-16949.
9. Zhang, Y.; Zhang, C.; Ma, R.; Du, X.; Dong, W.; Chen, Y.; Chen, Q., An ultra-sensitive Au nanoparticles functionalized DNA biosensor for electrochemical sensing of mercury ions. *Mater. Sci. Eng. C* **2017**, *75*, 175-181.
10. Wang, S.; Chen, H.; Xie, H.; Wei, L.; Xu, L.; Zhang, L.; Lan, W.; Zhou, C.; She, Y.; Fu, H., A novel thioctic acid-carbon dots fluorescence sensor for the detection of Hg<sup>2+</sup> and thiophanate methyl via S-Hg affinity. *Food Chemistry* **2021**, *346*, 128923.
